# Supplementary material for: Defining Mitochondrial Cristae Morphology Changes Induced by Aging in Brown Adipose Tissue
Source: PubMed Central journal article supplement (PMC10869235; doi:10.1002/adbi.202300186), 2023-08-21

410 **Supplemental Figure 1: Display of raw mitochondrial quantifications.** Each bar represents  
411 one of the three mice surveyed at respective age points while dots represent individual  
412 mitochondria (n is approximately 300). Values are displayed for (A) mitochondrial volume, (B)  
413 area, (C) perimeter, (D) complexity index, and (E) sphericity.

414

415 **Supplemental Figure 2: Display of raw cristae quantifications.** Each bar represents one of the  
416 three mice surveyed at respective age points while dots represent individual mitochondria (n is  
417 approximately 300). Values are displayed for (A) cristae volume, (B) area, and (C) perimeter.

418

419 **Supplemental Figure 3: Overall cristae-otyping changes across aging.** (A) 3-month murine  
420 BAT 3D reconstruction of cristae viewed from the transverse and (A') 3D reconstruction viewed  
421 from a longitudinal point of view. (B) 2-year murine BAT 3D reconstruction of cristae viewed  
422 from the transverse point of view (B') 3D reconstruction viewed from a longitudinal point of  
423 view. (C) Cristae-otyping to compare cristae morphology in samples from 3-month and 2-year  
424 across volumes.

SFig. 1

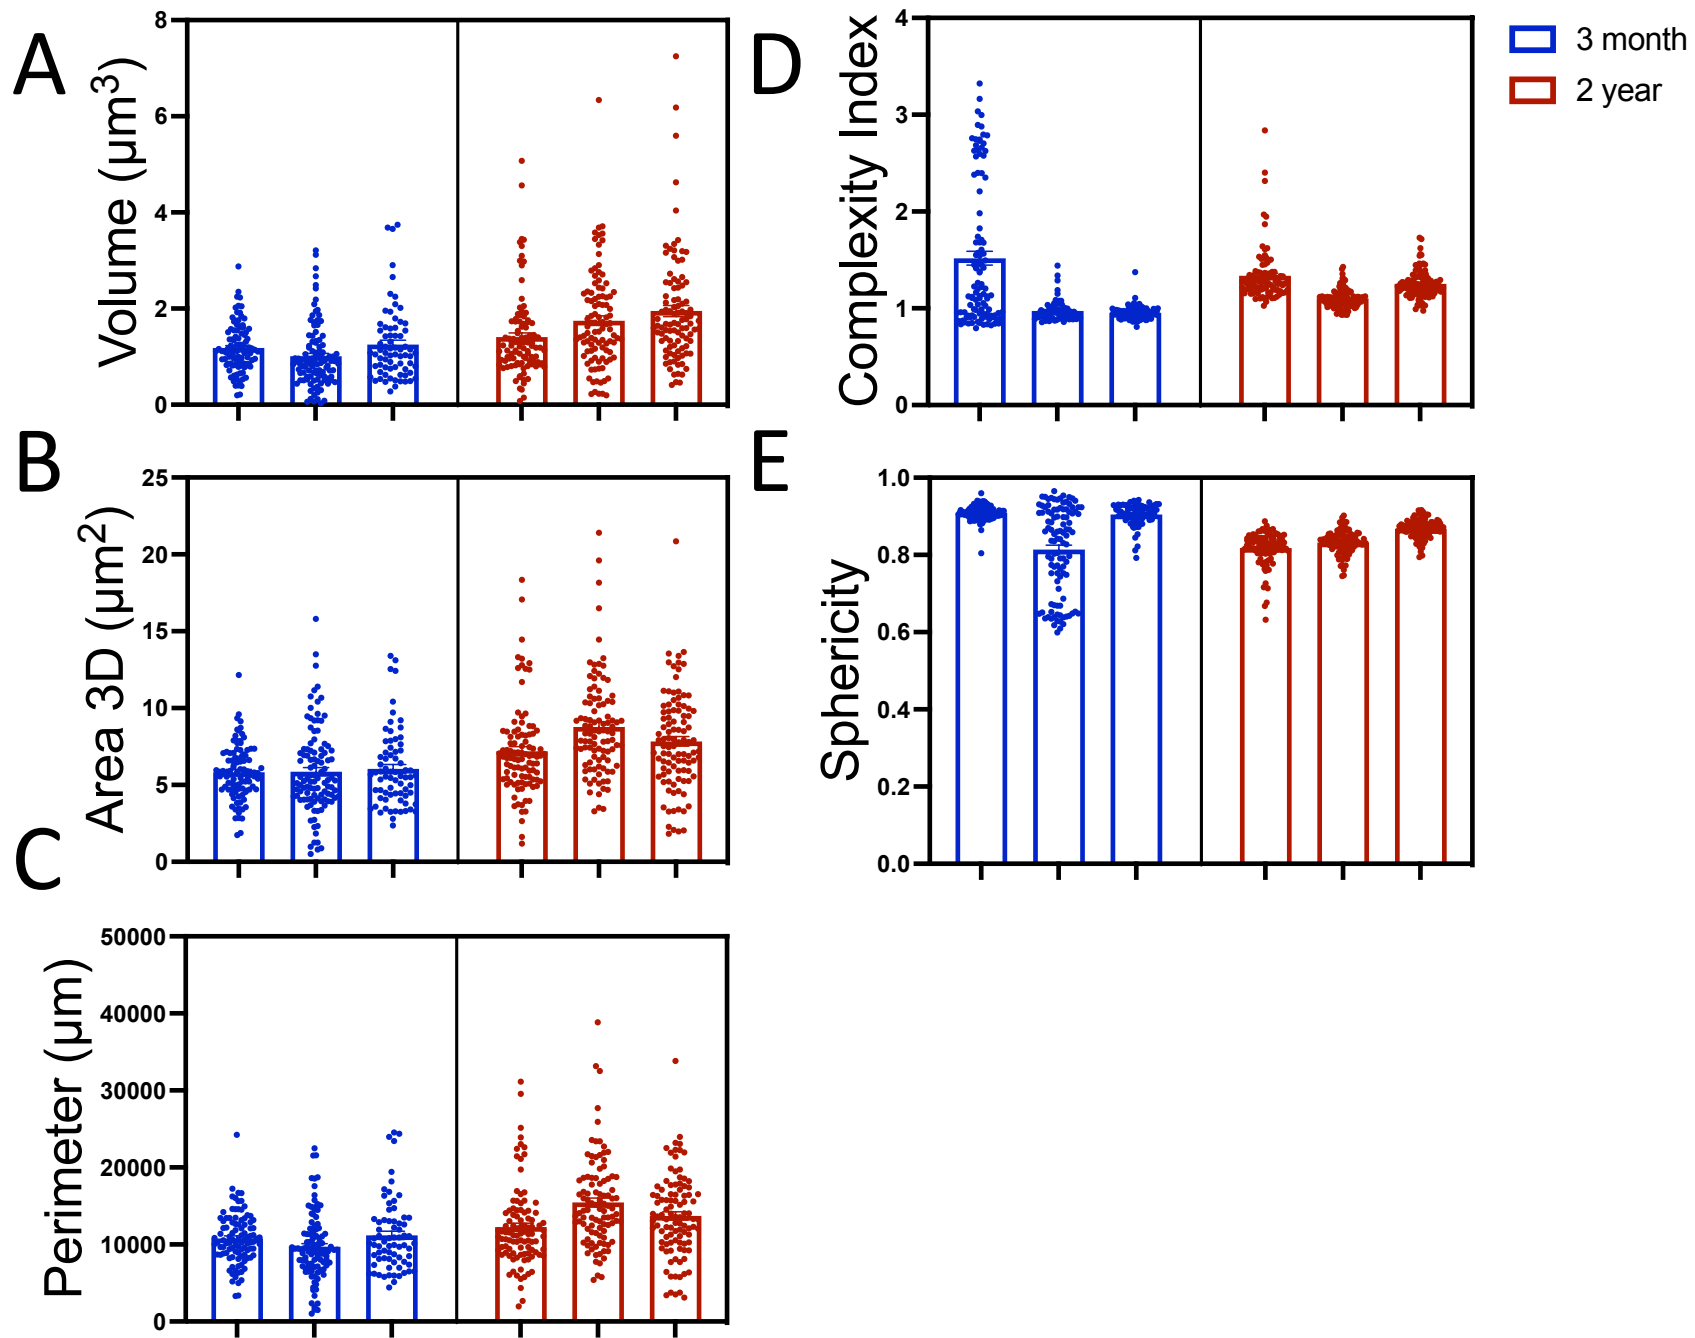

SFig. 2

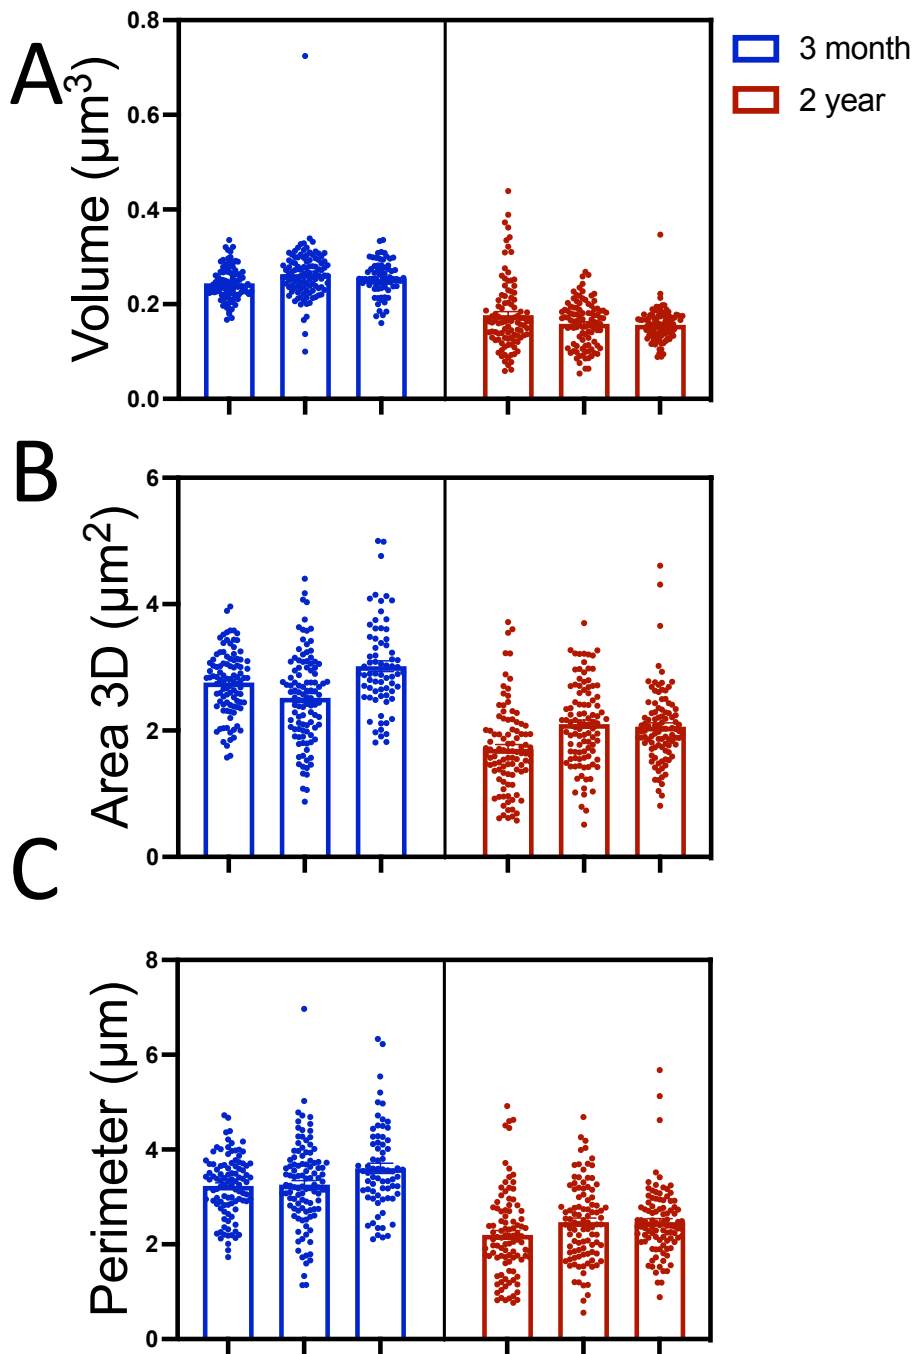

SFig. 3

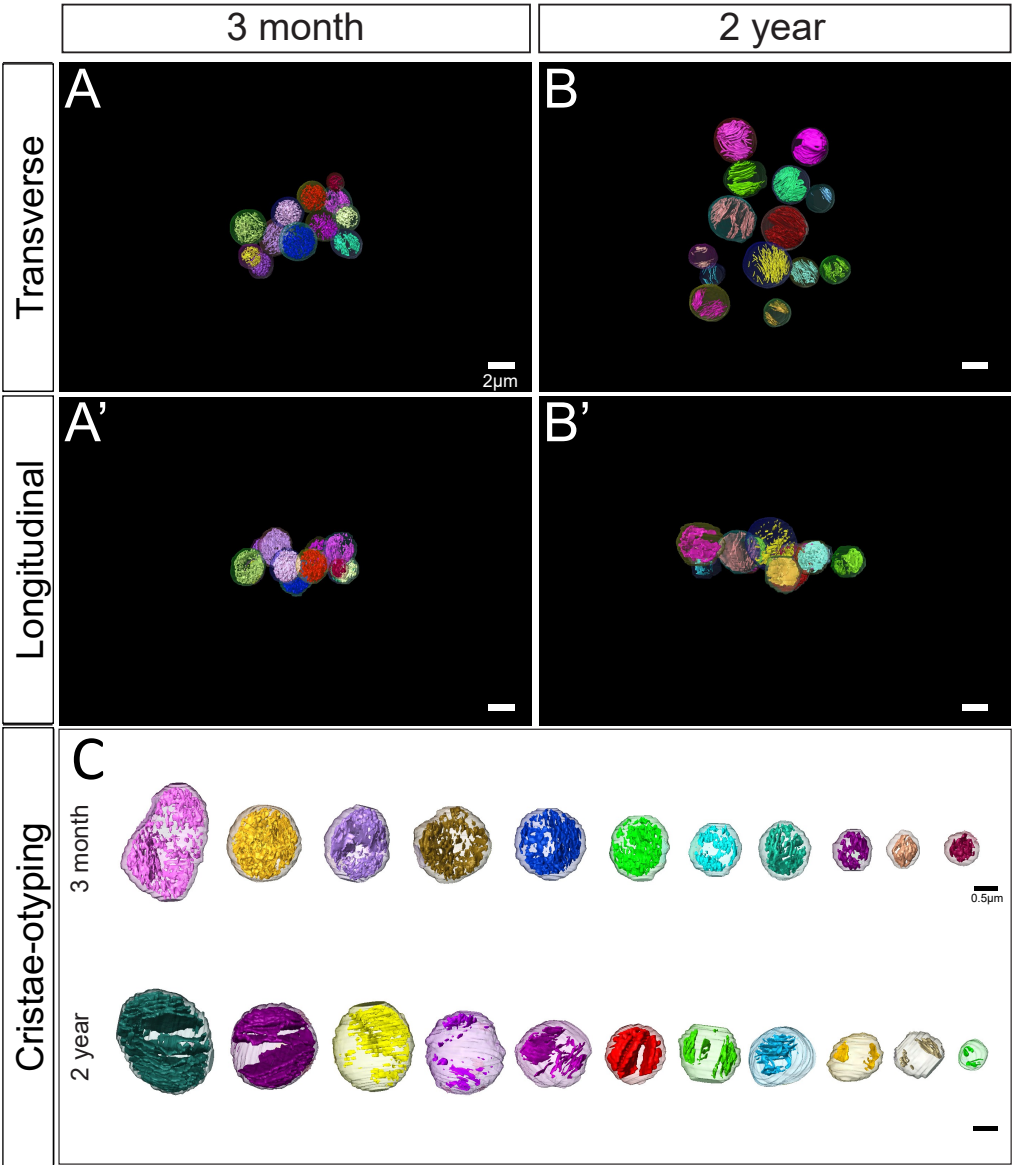

Supplement: NIHMS1962717-supplement-suppl__figure_1-3.pdf [file NIHMS1962717-supplement-suppl__figure_1-3.pdf]
